# Supplementary material
Source: PubMed Central journal article supplement (PMC3106179)
Supplement: NIHMS288522-supplement-Supplementary_Material.pdf [file NIHMS288522-supplement-Supplementary_Material.pdf]

## **SUPPLEMENTARY INFORMATION**

### **Methylation determines fibroblast activation and fibrogenesis in the kidney**

Wibke Bechtel, Scott McGoohan, Elisabeth M. Zeisberg, Gerhard A. Müller, Hubert Kalbacher, David J. Salant, Claudia A. Müller, Raghu Kalluri and Michael Zeisberg

#### **Contents:**

Supplementary Figures 1-9

Supplementary Tables 1-3

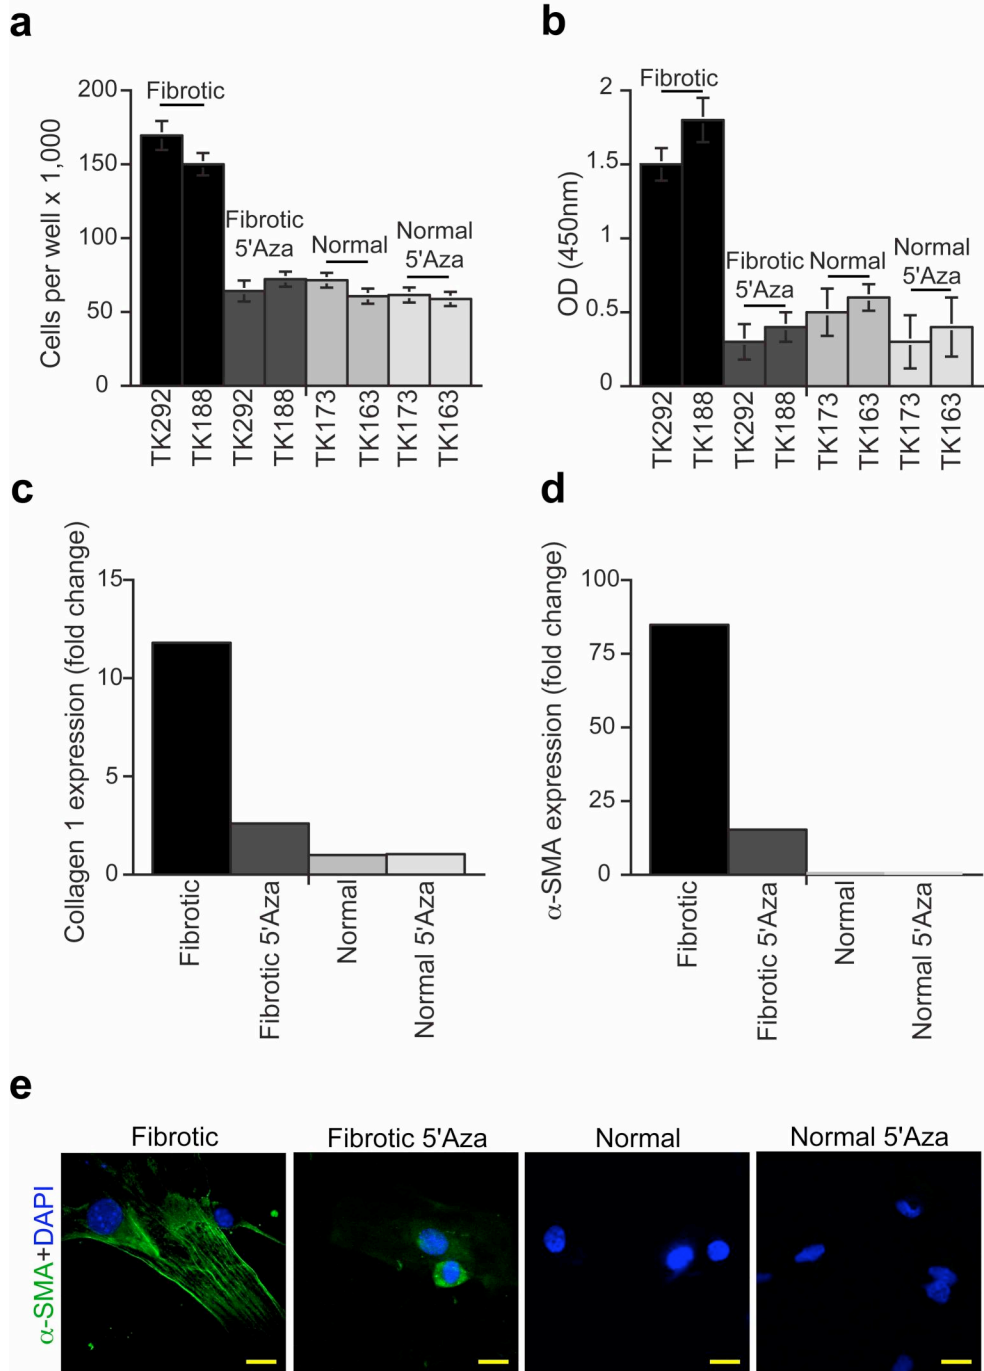

**Supplementary Figure 1. 5'azacytidine normalizes fibrotic human kidney fibroblasts.** **a.** Proliferation of primary human fibroblasts from fibrotic (TK292 and TK188) and non-fibrotic kidneys (TK173 and TK163) in response to 5'azacytidine. The graph summarizes average cell numbers after 96 hours. **b.** Type I collagen was analyzed

by ELISA in tissue culture supernatants of fibrotic and non-fibrotic kidney fibroblasts with or without 5'azacytidine incubation. The graph displays average relative OD readings of each group as assessed by quantitative real-time PCR. **c.** The bar graph summarizes relative expression levels of alpha2 chain of type I collagen of each group. **d.** Expression of  $\alpha$ -SMA was quantified by real-time PCR. **e.** Fibroblasts were labeled with FITC-conjugated antibodies to  $\alpha$ -SMA (green). The pictures display representative photomicrographs of each group. Scale bars 20  $\mu$ m.

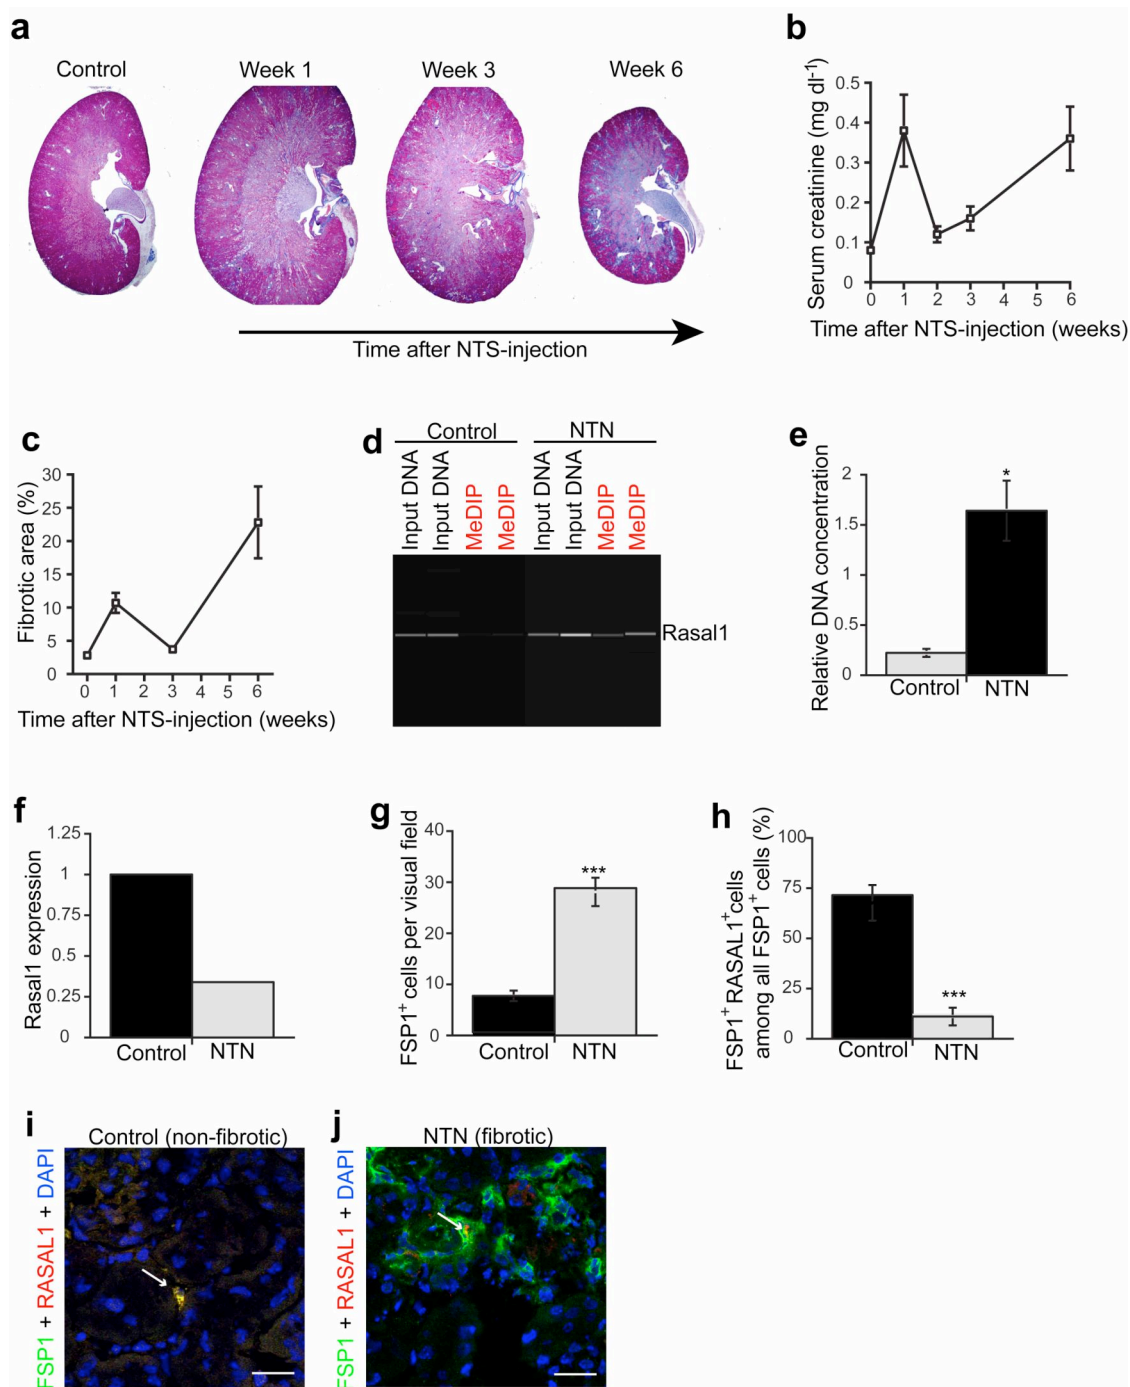

**Supplementary Figure 2. *Rasal1* hypermethylation and transcriptional silencing in renal fibroblasts in the mouse model of nephrotoxic serum nephritis (NTN).** **a.** The pictures display representative photomicrographs of Masson-Trichrome-stained kidney sections before, and one, three and six weeks after immunization with nephrotoxic

serum. Scale bars 200  $\mu\text{m}$ . **b.** The graph summarizes average serum creatinine levels of mice before NTN injection (week 0), and at one, two, three and six weeks after NTN-injection. **c.** Average relative fibrotic area in kidneys of mice before NTN injection (week 0), and at one, three and six weeks after NTN-injection. **d.** The picture displays a virtual gel of methylated DNA immunoprecipitation analysis. PCR products of control input DNA and immunoprecipitated DNA (MeDIP) of non-fibrotic control kidneys and NTN kidneys (week 6) are displayed. **e.** The bar graph summarizes average DNA concentration of the methylated RASAL1 PCR product band in each group. The results were normalized to the corresponding input DNA. **f.** The graph summarizes RASAL1 expression levels in relation to control kidneys (week 0) during NTN progression. **g-j.** We performed immunofluorescence double-labeling experiments using antibodies to RASAL1 (red) and FSP1 (green). The graph in panel **g** summarizes the number of FSP1<sup>+</sup> fibroblast per visual field in each group. The graph in **h** summarizes average number of FSP1<sup>+</sup>RASAL1<sup>+</sup> cells among all FSP1<sup>+</sup> fibroblasts per group. The picture in panel **i** displays a representative confocal photomicrograph of a non-fibrotic kidney, in panel **j** a confocal picture of a fibrotic kidney is displayed. FSP1<sup>+</sup> fibroblasts were predominantly RASAL1<sup>+</sup> in non-fibrotic kidneys (arrow). Scale bars 20  $\mu\text{m}$ . \*  $P < 0.05$ ; \*\*\*  $P < 0.001$ .

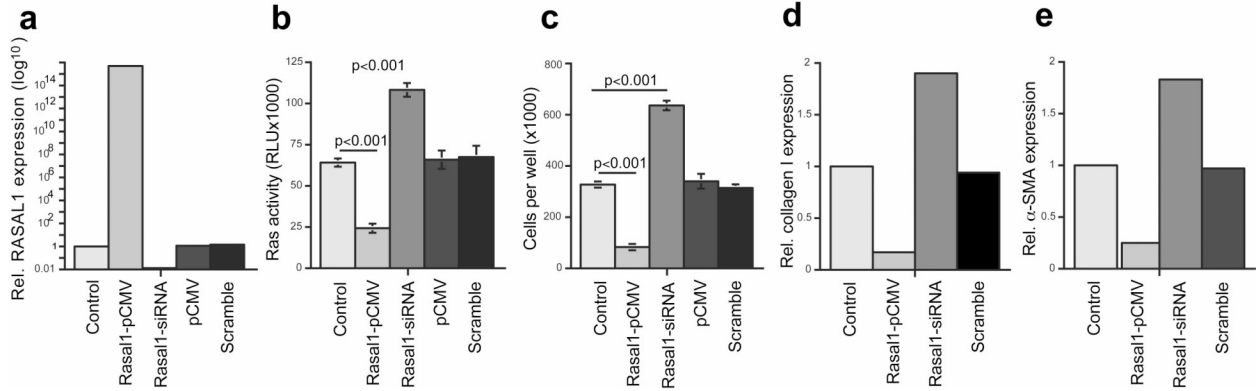

**Supplementary Figure 3. RASAL1 expression determines renal fibroblast**

**activation in human fibroblasts. a.** 293 embryonic kidney fibroblasts were transfected with the pCMV6-XL-RASAL1 expression vector (RASAL1-pCMV) to increase RASAL1 expression levels, or with RASAL1 siRNA (RASAL1-siRNA) to decrease RASAL1. pCMV empty vector and scrambled siRNA were used as controls. The bar graph summarizes quantitative RT-PCR analysis of RASAL1 expression. **b.** The bar graph summarizes average Ras-GTPase activity in each group. **c.** 293 cells were seeded into 6-well plates at a density of 80,000 cells per well. The bar graph summarizes cell number of each group after three days in serum free media. **d.** Type I collagen expression by TK173 fibroblasts was assessed by quantitative real-time PCR using primers specific for the alpha2 chain of type I collagen. **e.** The bar graph summarizes average α-SMA expression in each group.

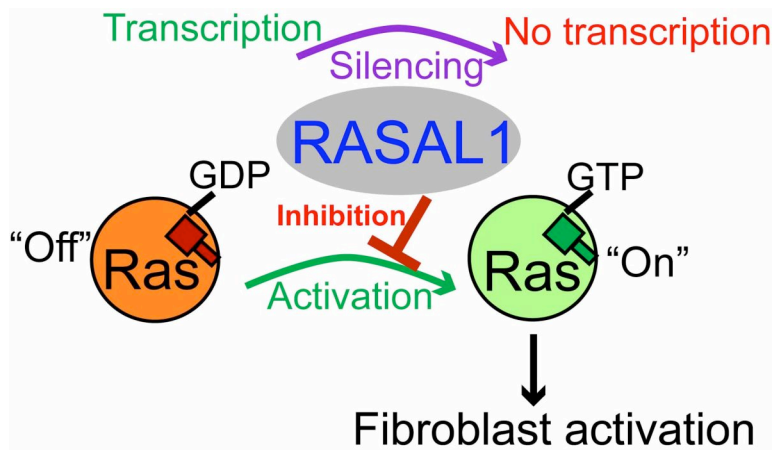

**Supplementary Figure 4. RASAL1 silencing causes fibroblast activation.** RASAL1 is a member of the RAS-GAP family, which catalyzes Ras inactivation by binding to GTP-Ras and catalyzing hydrolysis to GDP-Ras. Transcriptional silencing of RASAL1 causes Ras hyperactivity, ultimately leading to fibroblast activation.

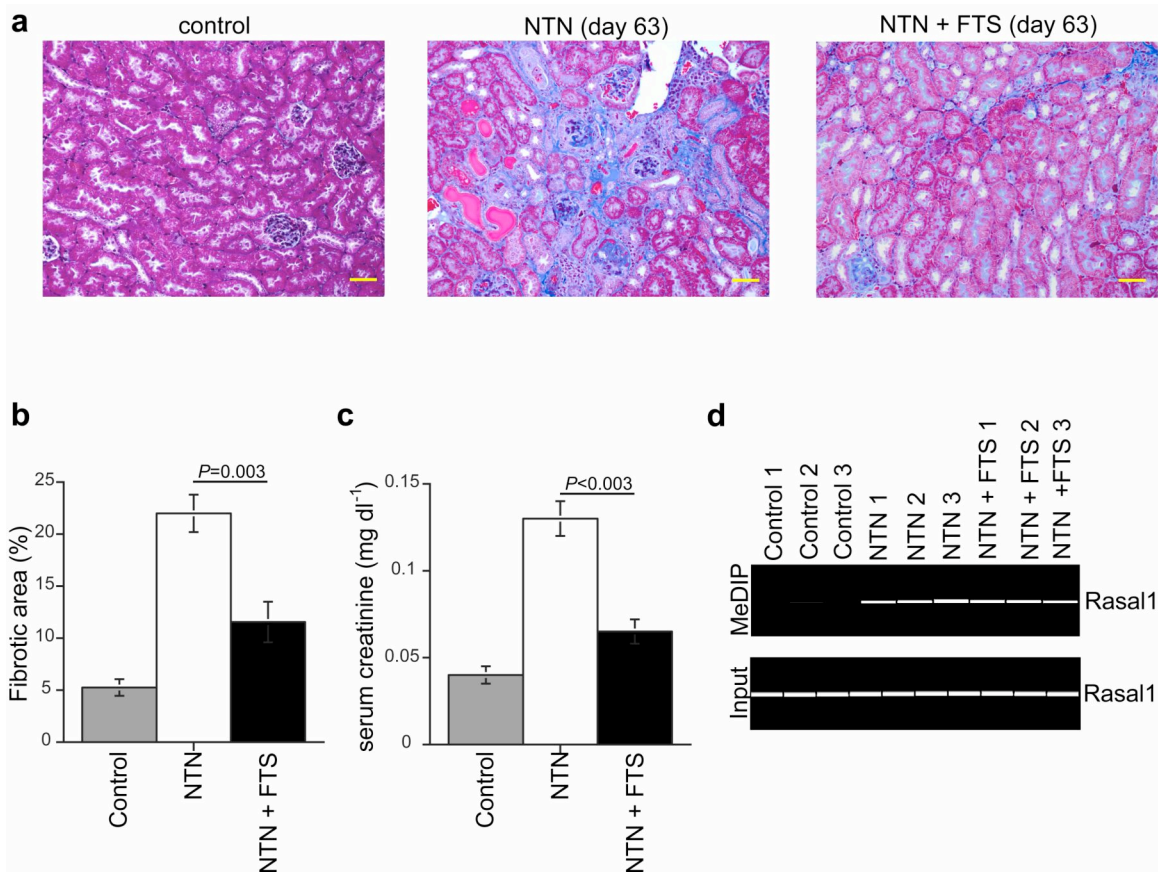

**Supplementary Figure 5. Inhibition of Ras activity ameliorates renal fibrosis in the mouse model of nephrotoxic serum nephritis.** **a.** The pictures display representative photomicrographs of MTS-stained kidneys of healthy C57BL/6 mice (control), of mice which had received nephrotoxic serum (9 weeks after immunization) and mice which had received treatment with the Ras-inhibitor FTS in addition to receiving nephrotoxic serum. Scale bars 20  $\mu$ m. **b.** The bar graph summarizes the relative fibrotic area in each group. **c.** The bar graph summarizes average serum creatinine level (at day 63 after immunization). **d.** The picture displays representative virtual gels of *Rasal1* MeDIP analysis. The upper panel displays amplified methylated *Rasal1* DNA, the bottom picture displays the control input DNA.



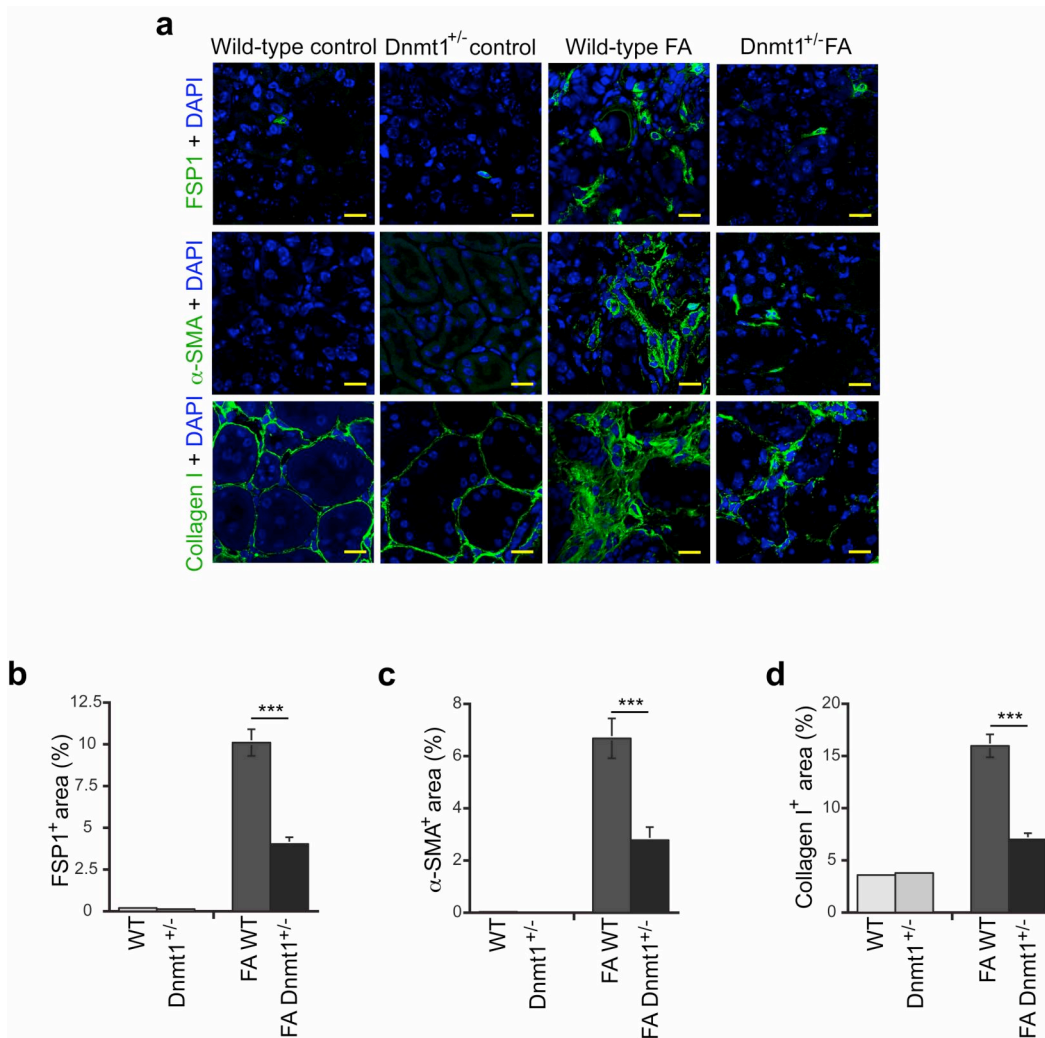

**Supplementary Figure 6. Progression of Folic acid-induced nephropathy in *Dnmt1*<sup>+/-</sup> hemizygous deficient and wildtype mice.** **a.** The pictures display representative confocal photomicrographs of C57BL/6 wildtype mice, of *DNMT*<sup>+/-</sup> mice, of C57BL/6 mice which had received folic acid 150 days prior to sacrifice and kidneys of *DNMT*<sup>+/-</sup> mice which had been challenged with folic acid, all labeled with antibodies to FSP1 (top row), αSMA (middle row) and type I collagen (bottom row). Scale bars 20 μm. **b-d.** Staining analysis. The bar graphs summarize relative FSP1-labeled area (**b**), relative αSMA-labeled area (**c**) and relative type I collagen-labeled area (**d**) in each group. \*\*\* P<0.01

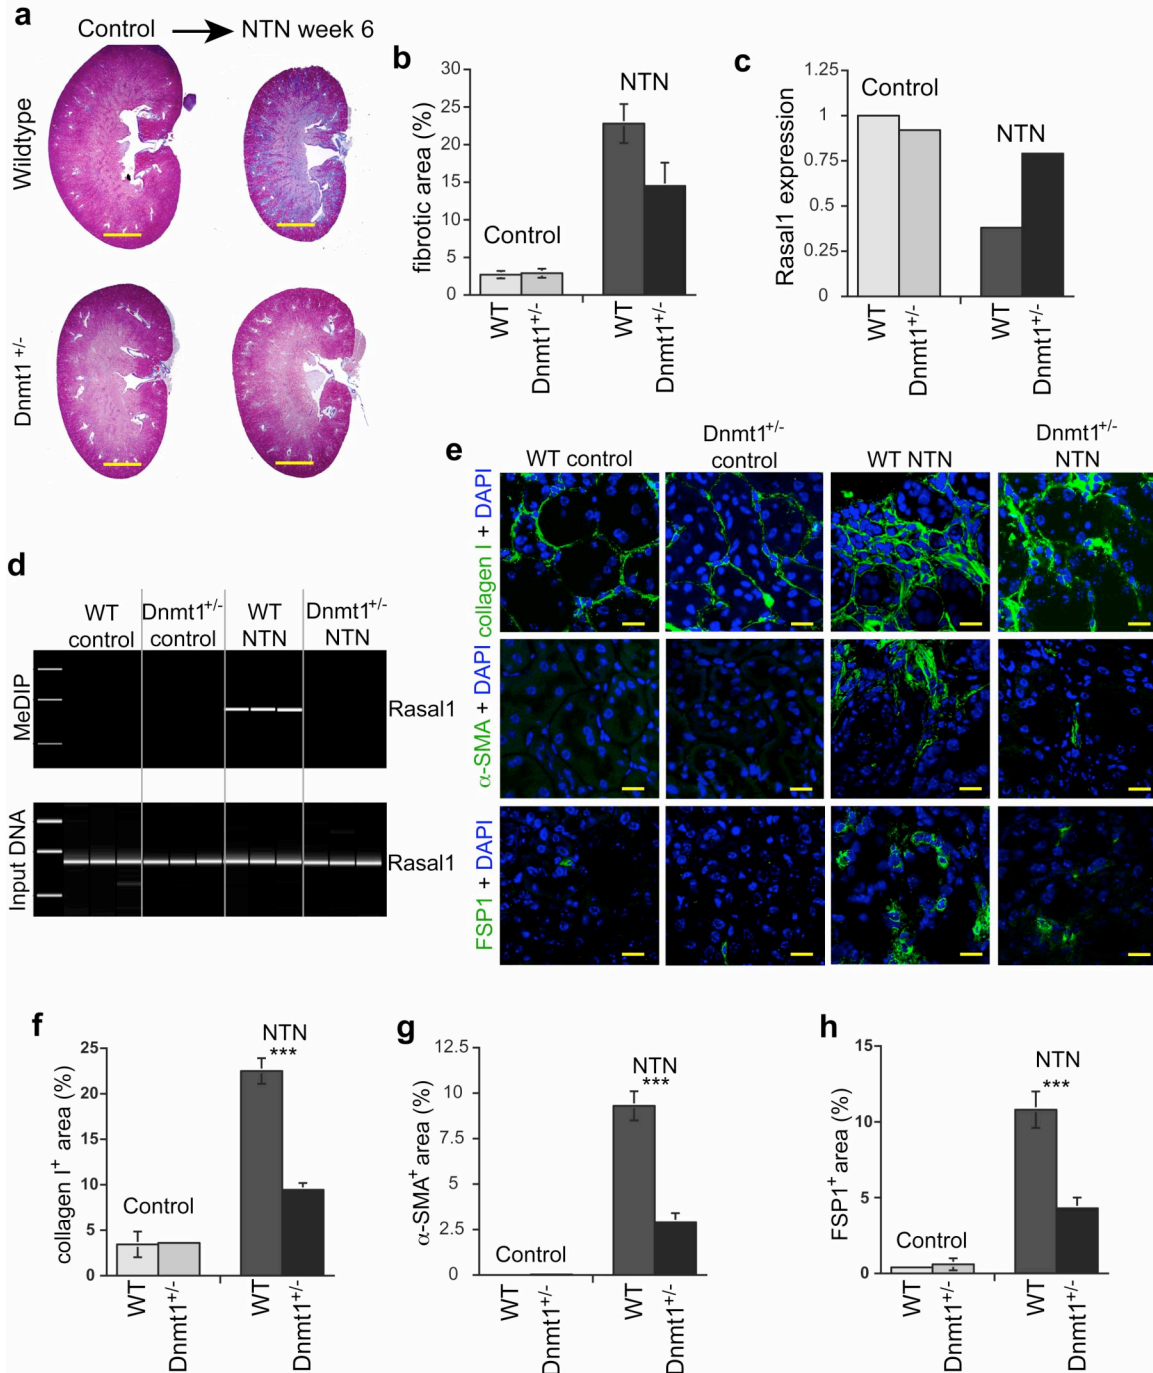

**Supplementary Figure 7. Progression of Nephrotoxic serum nephritis (NTN) in *Dnmt1*<sup>+/-</sup> hemizygous deficient and wildtype<sup>+/+</sup> mice.** **a.** The panel displays MTS-stained kidney sections from wildtype and *Dnmt1*<sup>+/-</sup> mice that were obtained before injection of NTN (left pictures) and six weeks after NTN-injection (right pictures). Scale bars 200  $\mu$ m.

**b.** The graph summarizes average relative fibrotic area in kidneys of wildtype and *Dnmt1*<sup>+/-</sup> mice before NTN injection (control) and six weeks post NTN-injection. **c.** The graph summarizes Rasal1 expression levels in relation to wildtype control kidneys. **d.** The picture displays a virtual gel of methylated DNA Immunoprecipitation analysis. PCR products of control input DNA (bottom panel) and immunoprecipitated *Rasa1* DNA (MeDIP, top panel) of wildtype NTN kidneys and NTN *Dnmt1*<sup>+/-</sup> kidneys (both six weeks after NTN injection) are displayed. **e.** Frozen kidney sections were labeled with antibodies to type I collagen (top row),  $\alpha$ SMA (middle row) and FSP1 (bottom row). The pictures display representative confocal photomicrographs of each group. Scale bars 20  $\mu$ m. **f-h.** The bar graphs summarize relative type I-collagen labeled area (**f**), relative  $\alpha$ SMA-labeled area (**g**) and relative FSP1-labeled area (**h**) in each group. \*\*\*  $P < 0.001$

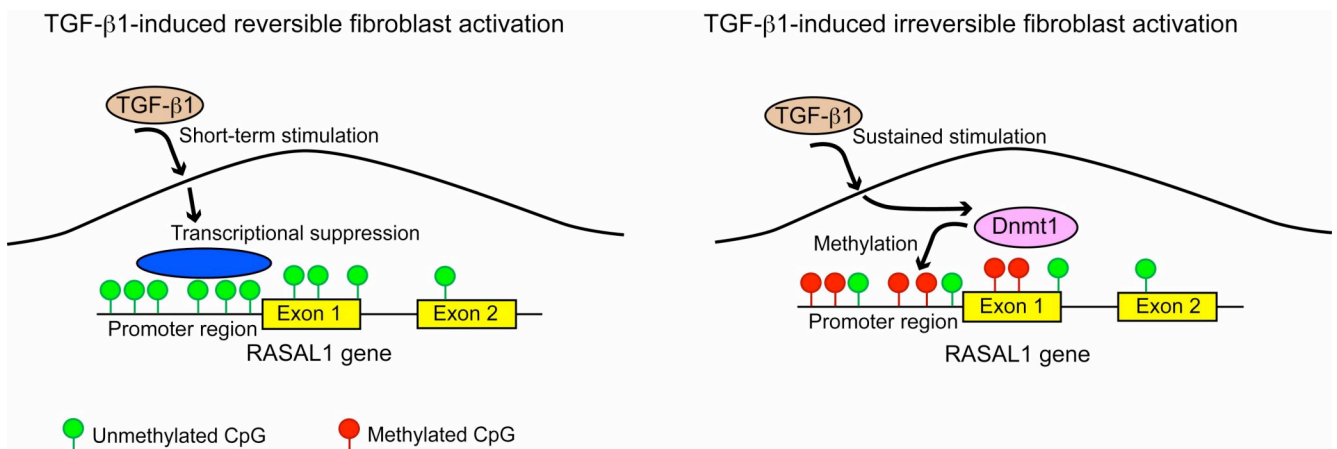

**Supplementary Figure 8. Dual modes of *RASAL1* silencing in TGFβ1-induced fibroblast activation.** Our cell culture experiments suggest that TGFβ1 causes transcriptional silencing of *RASAL1* via two different mechanisms. **Left.** Short-term exposure of fibroblasts results in transcriptional suppression of *RASAL1* without hypermethylation. Such *RASAL1* suppression is reversible upon removal of TGFβ1. **Right.** Sustained exposure of fibroblasts (over 5 days) results in *RASAL1* hypermethylation. TGFβ1-induced *RASAL1* hypermethylation is dependent on the methyltransferase Dnmt1. Transcriptional suppression of *RASAL1* caused by hypermethylation is irreversible upon removal of TGFβ1.

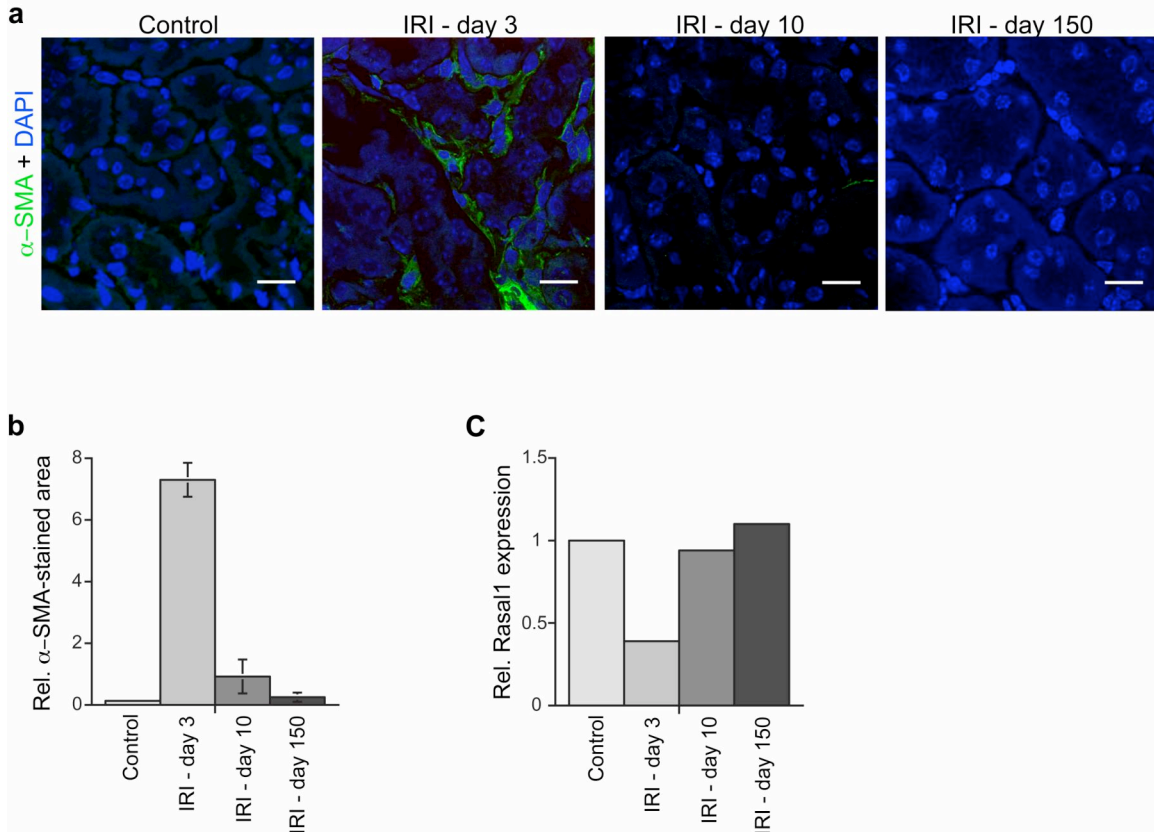

**Supplementary Figure 9. Correlation of transient fibroblast activation and transient decrease of Rasal1 expression in reversible ischemia-reperfusion injury.**

**a.** The pictures display representative confocal photomicrographs of  $\alpha$ -SMA -stained kidney sections from the indicated time-points after clamping of the renal pedicle for 30 minutes. Peak of injury three days after ischemia-reperfusion injury is associated with transient fibroblast accumulation. The kidney then spontaneously regenerates within 10 days associated with decrease of  $\alpha$ -SMA<sup>+</sup> fibroblasts. Scale bars 20  $\mu$ m. **b.** The bar graph summarizes relative  $\alpha$ SMA-labeled area in each group. **c.** The graph summarizes Rasal1 expression levels in relation to control kidneys at each time-point.

| Culture ID# | Histology                  | Fibrosis | Prolif | $\alpha$ SMA | Col1 | Array | MSP | BGS |
|-------------|----------------------------|----------|--------|--------------|------|-------|-----|-----|
| TK 88       | Mesangioproliferative GN   | ++       | +      | +            | +    |       | X   | X   |
| TK 110      | Mesangioproliferative GN   | +++      | +      | +            | +    | X     | X   | X   |
| TK 124      | Minimal Inter-capillary GN | -        | -      | -            | -    |       | X   | X   |
| TK 150      | Mesangioproliferative GN   | ++       | +      | +            | +    |       | X   | X   |
| TK 156      | Severe Nephrosclerosis     | +++      | +      | +            | +    | X     | X   | X   |
| TK 163      | Normal                     | -        | -      | -            | -    | X     | X   | X   |
| TK 173      | Minimal Change GN          | -        | -      | -            | -    |       | X   | X   |
| TK 188      | IgA Nephritis              | +++      | +      | +            | +    |       | X   | X   |
| TK 210      | Minimal Inter-capillary GN | -        | -      | -            | -    | X     | X   | X   |
| TK 213      | Mesangioproliferative GN   | +++      | +      | +            | +    |       | X   | X   |
| TK 239      | Transplant Rejection       | +++      | +      | +            | +    | X     | X   | X   |
| TK 257      | Endocapillary GN           | +++      | +      | +            | +    | X     | X   | X   |
| TK 260      | Normal (RCC)               | -        | -      | -            | -    | X     | X   | X   |
| TK 261      | Mesangioproliferative GN   | ++       | +      | +            | +    | X     | X   | X   |
| TK 270      | CAN                        | +++      | +      | +            | +    |       | X   | X   |
| TK 274      | Wegener's Granulomatosis   | +++      | +      | +            | +    | X     | X   | X   |
| TK 282      | Membranous GN              | ++       | +      | +            | +    | X     | X   | X   |
| TK 284      | Mesangioroliferative GN    | +++      | +      | +            | +    |       | X   | X   |
| TK 292      | IgA Nephritis              | +++      | +      | +            | +    |       | X   | X   |

**Supplementary Table 1. *RASAL1* methylation in human renal fibroblasts.**

**Culture ID#.** Primary kidney fibroblasts cultures were named in order of tissues received.

**Histology.** Summary of the pathological diagnoses of the biopsies of which the primary fibroblasts were derived. Normal kidney was intended for transplantation but could not be transplanted. Normal (RCC) was obtained from the unaffected part of kidneys that were removed due to renal cell carcinoma. CAN: Chronic allograft nephropathy.

**Fibrosis.** The biopsies were semiquantitatively scored by a pathologist for fibrosis (-: normal; +: mild fibrosis; ++ robust fibrosis; +++: severe fibrosis).

**Prolif.** + indicates increased proliferative activity of primary cultures.

**$\alpha$ SMA.** + indicates increased  $\alpha$ SMA expression of primary cultures.

**Col1.** + indicates increased type I collagen synthesis by primary cultures.

**Array.** X indicates which fibroblast cultures were analyzed in genome-wide methylation screen.

**MSP.** X indicates which fibroblast cultures were analyzed by *RASAL1* specific methylation specific PCR.

**BGS.** X indicates fibroblast cultures in which *RASAL1* methylation was analyzed by bisulfite genomic sequencing.

| Name              | Function                               | CpG in promoter in human and mouse | Decreased in fibrosis |
|-------------------|----------------------------------------|------------------------------------|-----------------------|
| <i>DLG2</i>       | Function unknown (found in oncocytoma) | yes                                | no                    |
| <i>Enc</i>        | Function unknown (eye development)     | yes                                | no                    |
| <i>Eya1</i>       | (kidney development)                   | yes                                | yes                   |
| <i>Fez1/Lzts1</i> | cell cycle inhibitor                   | no                                 | no                    |
| <i>HIPK1</i>      | Heat shock protein                     | yes                                | no                    |
| <i>HIPK2</i>      | Heat shock protein                     | yes                                | no                    |
| <i>HIPK3</i>      | Heat shock protein                     | yes                                | no                    |
| <i>Lrnf2</i>      | neuronal transmembrane protein         | yes                                | yes                   |
| <i>Odd1</i>       | kidney development                     | yes                                | no                    |
| <i>Pax3</i>       | kidney development                     | yes                                | no                    |
| <i>RASAL1</i>     | Ras suppressor                         | yes                                | yes                   |
| <i>Zu5</i>        | NF-kappaB inhibitor                    | no                                 | no                    |

**Supplementary table 2: Methylated genes in fibrotic human renal fibroblasts.**

**Name.** List of genes that were methylated in all tested fibrotic fibroblasts and in none of the non-fibrotic fibroblasts.

**Function.** Primary known function of the identified genes.

**CpG in promoter in human and mouse.** Presence of CpG islands within predicted promoter region in human and mice ("no" indicates not present in mouse).

**Decreased in fibrosis.** Decreased mRNA expression (at least two-fold) as determined by quantitative real-time PCR of total RNA lysates of fibrotic mouse kidneys.

### Supplementary table 3

#### Real-time PCR primers

| Primer         | Name                                           | Target sequence                    |
|----------------|------------------------------------------------|------------------------------------|
| hRASAL         | hRASAL1-213F                                   | CGTGCTGGATGAGGACACTG               |
|                | hRASAL1-275R                                   | TCCCTGCTCAGCGAGATCTT               |
|                | hRASAL1-234T TaqMan <sup>®</sup> probe         | FAM-CGGGCACGACGACATCATCGG-TAMRA    |
| h $\alpha$ SMA | h $\alpha$ SMA -277F                           | GAAGAGCATCCCACCCTGC                |
|                | h $\alpha$ SMA -388R                           | ATTTTCTCCCGGTTGGCCT                |
|                | h $\alpha$ SMA -298T TaqMan <sup>®</sup> probe | FAM-ACGGAGGCACCCCTGAACCCC-TAMRA    |
| hCol1A2        | hCOL1A2-238F                                   | GGTGAAGTGGGTCTTCCAGG               |
|                | hCOL1A2-307R                                   | TAAGGCCGTTTGCTCCAGG                |
|                | hCOL1A2-259T TaqMan <sup>®</sup> probe         | FAM-CTCTCCGGCCCCGTTGGACC-TAMRA     |
| mCol1A1        | mCol1A1-281F                                   | ATGGATTCCCGTTTCGAGTACG             |
|                | mCol1A1-343R                                   | TCAGCTGGATAGCGACATCG               |
|                | mCol1A1-304T TaqMan <sup>®</sup> probe         | FAM-AGCGAGGGCTCCGACCCCG-TAMRA      |
| mRASAL1        | mRasal1-316F                                   | CTCACAAGGCGTGAGGTGG                |
|                | mRasal1-381R                                   | TGCCAAGGAGTTAGAACGGAA              |
|                | mRasal1-336T TaqMan <sup>®</sup> probe         | FAM-TCGAACCAATGACCCCAACACCCT-TAMRA |
| m $\alpha$ SMA | m $\alpha$ SMA -133F                           | CACTATTGGCAACGAGCGC                |
|                | m $\alpha$ SMA -192R                           | CCAATGAAGGAAGGCTGGAA               |
|                | m $\alpha$ SMA -153T TaqMan <sup>®</sup> probe | FAM-TCCGCTGCCCGGAGACCCT-TAMRA      |

#### siRNA Oligos

| siRNA                      | Cat. No.                 | Target sequence                      |
|----------------------------|--------------------------|--------------------------------------|
| Mm_Rasal1_1                | SI01397207 (Qiagen)      | CTGGTCAAAGTGGATGACCAA                |
| Mm_Rasal1_2                | SI01397214 (Qiagen)      | AACGTGAATGACCTCAACCAA                |
| Mm_Rasal1_3                | SI01397221 (Qiagen)      | TGGGAAGATCTCATTGAGCAA                |
| Mm_Rasal1_4                | SI01397228 (Qiagen)      | CACGCGCTTTGCCTTCAAGAA                |
| Ctrl_AllStars_1            | SI03650318 (Qiagen)      | Proprietary of Qiagen, not disclosed |
| H_Rasal1_1                 | HSS112267 (Invitrogen)   | UGGCUUUGCUGGAAGAGCUGACCUU            |
| H_Rasal1_2                 | HSS112268 (Invitrogen)   | GGGACCAGCUCAGGCUGAAUUACU             |
| H_Rasal1_3                 | HSS112269 (Invitrogen)   | GGAUUCUAACAUGGAUACAACUCUG            |
| Stealth <sup>™</sup> siRNA | GC12935-300 (Invitrogen) | Proprietary of Qiagen, not disclosed |

#### MeDIP primers

| Primer        | Target sequence          |
|---------------|--------------------------|
| GADPH For     | GTCGGTGTGAACGGATTTGGC    |
| GADPH Rev     | GCTCCTGGAAGATGGTGATGG    |
| LAP For       | TGCGACTTCCTGAGTATATGACCC |
| LAP Rev       | GACCTTCAGTGGTTCTTCAGACAG |
| MethChIP For1 | CTGGCTCAGCCTCCTGTTCTG    |
| MethChIP Rev1 | CAGACAACCCCGATCCAGGACC   |



**MSP/BGS primers**

| <b>Primer</b>     |               | <b>Target sequence</b>    |
|-------------------|---------------|---------------------------|
| Human RASAL1 MSP  | RASALm11      | GTGTATTTTTGTTTTCGTCGTTT   |
|                   | RASALm2       | CAAAGAACTCTTACCGAAACG     |
|                   | RASALU3       | AATTTATTAGGAGTTAGTGGTTAT  |
|                   | RASALU2       | CACAACAACTCTTACCAAACA     |
| Human RASAL1 BGS1 | RASALBGS1     | GTTTAATGTTAATTTATTAGGAGTT |
|                   | RASALBGS3     | CTAACCACAACTTTCAAACAA     |
| Human RASAL1 BGS2 | RASALBGS2_For | TAGTTTGTTTGGAGTTTTAGA     |
|                   | RASALBGS2_Rev | ACCTACTTCAAACCTAACTCCCTAC |

**Cloning primers**

|                      |                                      |
|----------------------|--------------------------------------|
| hRASAL1RevCheckP     | 5'-CCAGGGTTAGATCCAGAACAG             |
| hRASALMFP2 (XhoI)    | 5'-TACTCGAGATCACAGTGGGCCAGGCATGGTGCC |
| hRASALMRP1 (HindIII) | 5'-TAAAGCTTCCGAAAGAGGAGAAGGTGTAGG    |
